# Supplementary material for: Sensitized luminescence in dinuclear lanthanide(iii) complexes of bridging 8-hydroxyquinoline derivatives with different electronic properties
Source: Royal Society of Chemistry journal article supplement (doi:10.1039/c0dt01663b), 2011-01-01
Supplement: c0dt01663b.pdf [file c0dt01663b.pdf]

# Supporting Information

## **Sensitized luminescence in dinuclear lanthanide(III) complexes of bridging 8-hydroxyquinoline derivatives with different electronic properties**

Hai-Bing Xu, Jia Li, Lin-Xi Shi, and Zhong-Ning Chen

*State Key Laboratory of Structural Chemistry, Fujian Institute of Research*

*on the Structure of Matter, the Chinese Academy of Sciences, Fuzhou,*

*Fujian 350002, China*

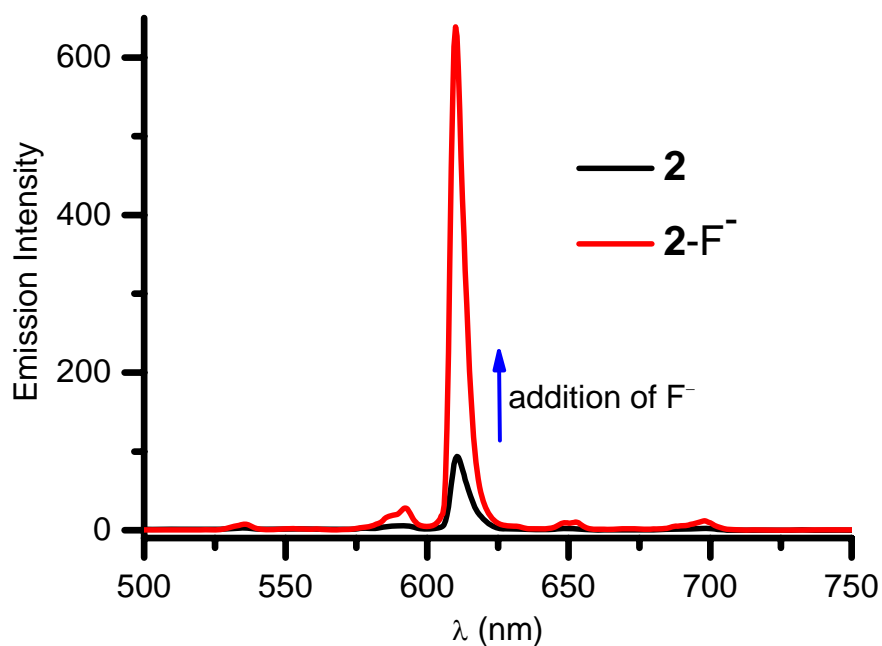

**Figure S1.** Fluoride-induced lanthanide(III) emission enhancement of **2** in dichloromethane solutions before (black) and after (red) addition of 2 equiv [Bu<sub>4</sub>N]F at ambient temperature.

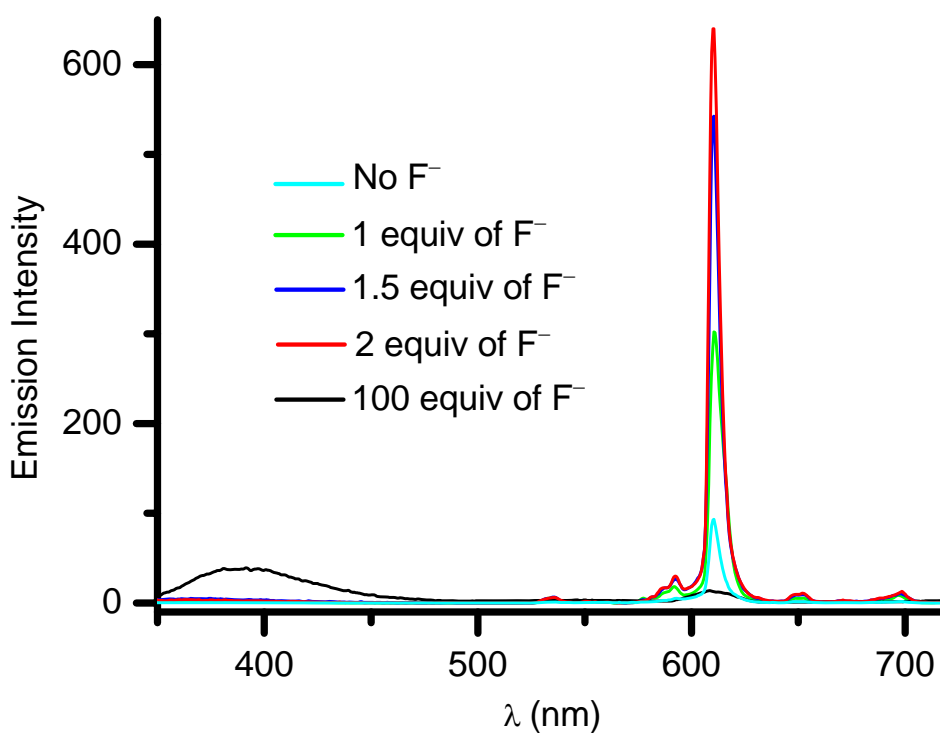

**Figure S2.** Emission spectra of **2** in dichloromethane before (cyan) and after addition of 1 (green), 1.5 (blue), 2 (red) and 100 (black) equivalent of [Bu<sub>4</sub>N]F at ambient temperature.

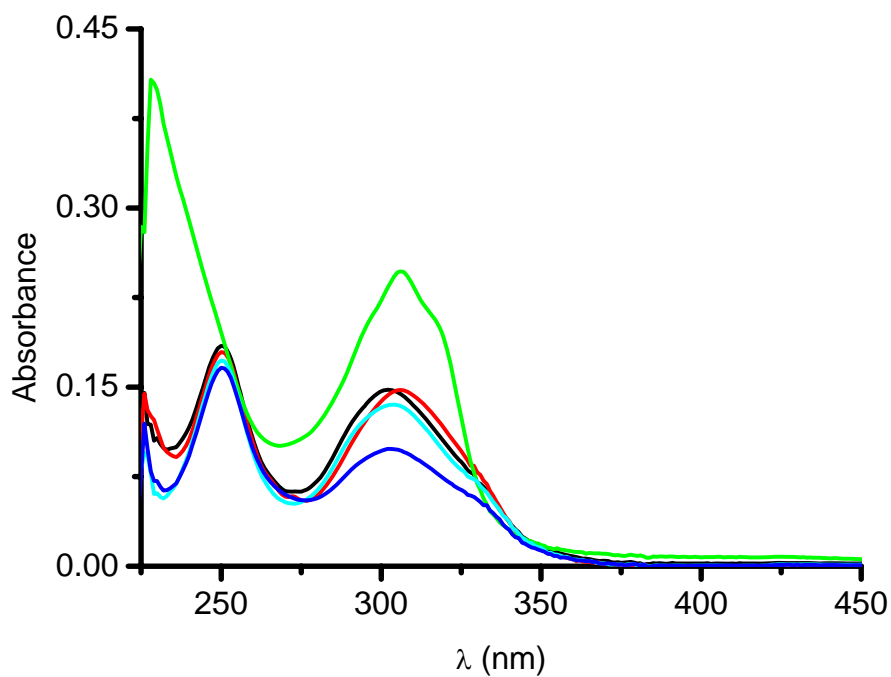

**Figure S3.** UV-vis absorption spectra of **2** in dichloromethane before (blue) and after addition of 1 (red), 1.5 (black), 2 (cyan) and 100 (green) equivalent of  $[\text{Bu}_4\text{N}]\text{F}$  at ambient temperature.

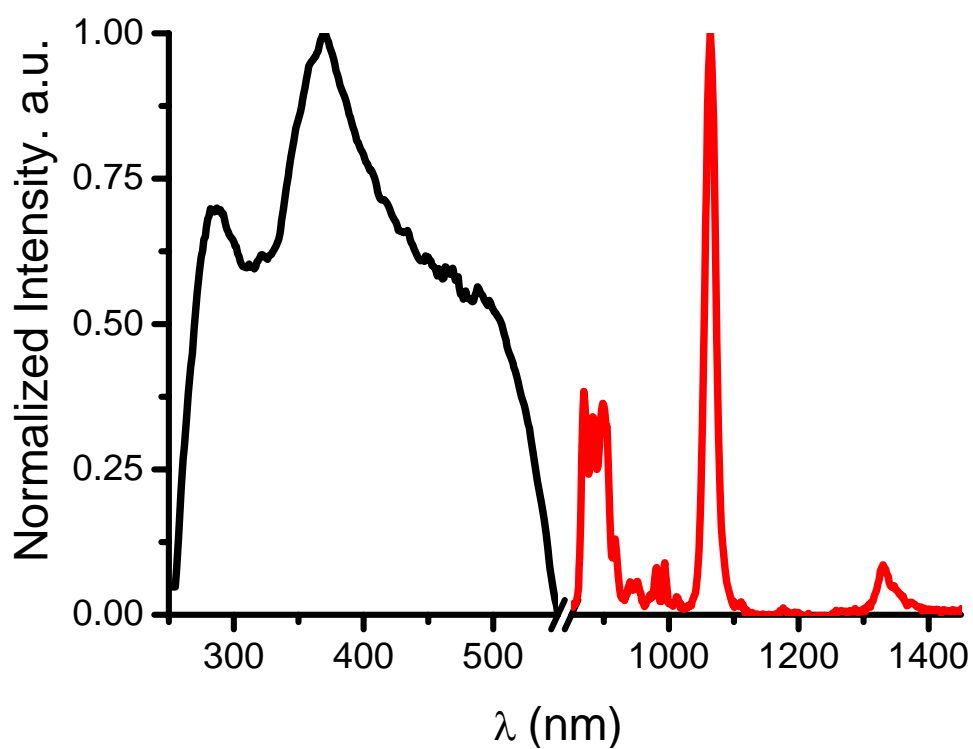

**Figure S4.** Excitation (black) and emission (red) spectra of **4** in solid state at ambient temperature.

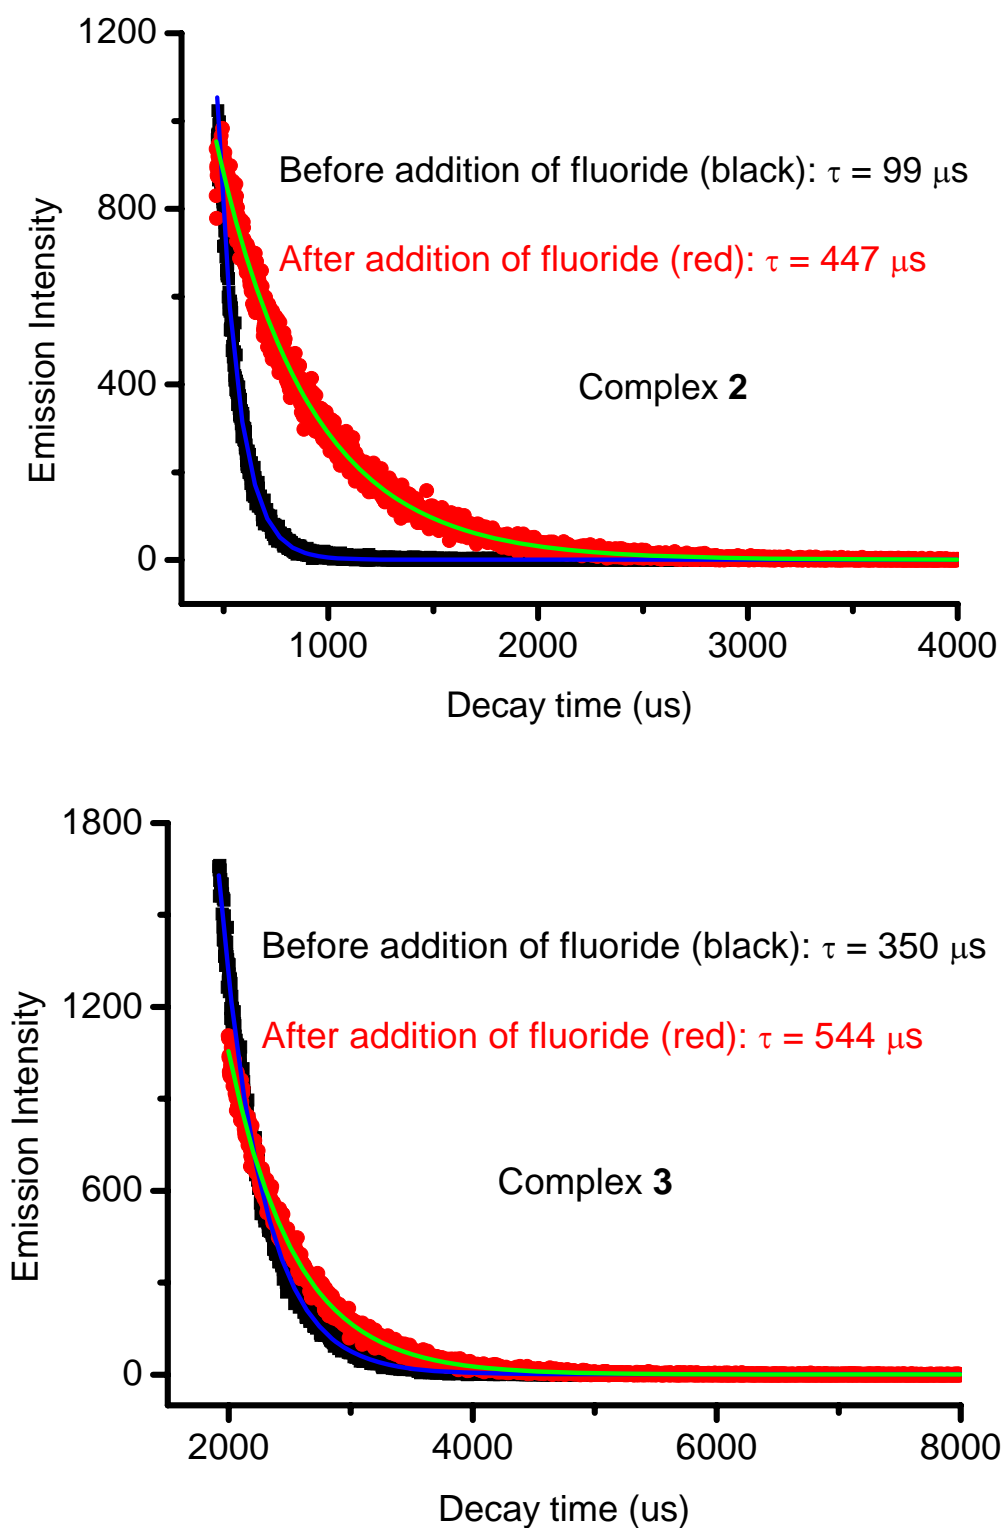

**Figure S5.** Comparison of the changes of lifetime decay curves of **2** (top) and **3** (bottom) in dichloromethane before (black) and after (red) addition of  $[\text{Bu}_4\text{N}]\text{F}$  (molar ratio of fluoride to **2** and **3** are 2 : 1, respectively).

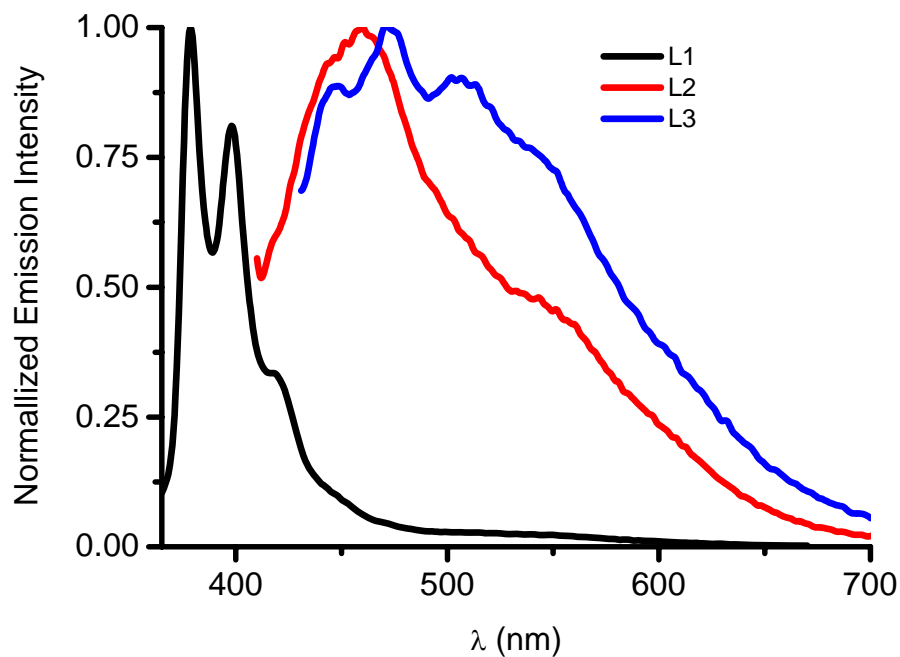

**Figure S6.** Emission band due to the  $\pi \rightarrow \pi^*$  excited state of HMq(L1), HPhMq (L2), and HMe<sub>2</sub>C<sub>6</sub>H<sub>4</sub>Mq (L3) in dichloromethane at ambient temperature.

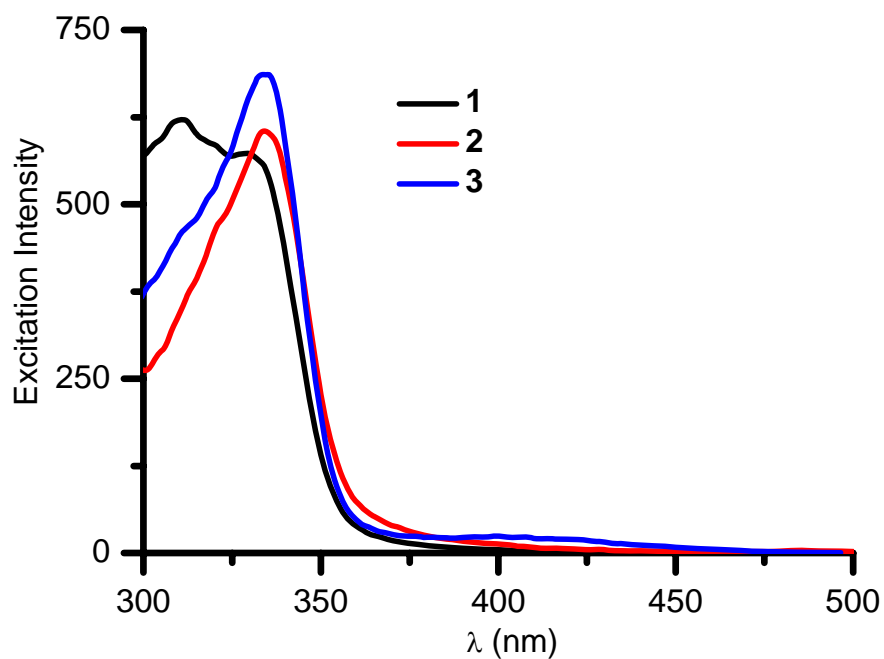

**Figure S7.** Excitation ( $\lambda_{\text{em}} = 610$  nm) spectra of **1** (black), **2** (red), and **3** (blue) in dichloromethane solution at 298K.
